# Supplementary material for: Bilobalide Induces Apoptosis in 3T3-L1 Mature Adipocytes through ROS-Mediated Mitochondria Pathway
Source: MDPI journal article supplement (doi:10.3390/molecules28176410), 2023-09-02
Supplement: s1 [file s1]

- 1.Marker
- 2.Cont 1
- 3.Cont 2
- 4.BB 25  $\mu$ M-1
- 5.BB 25  $\mu$ M-2
- 6.BB 50  $\mu$ M-1
- 7.BB 50  $\mu$ M-2
- 8.BB 100  $\mu$ M-1
- 9.BB 100  $\mu$ M-2

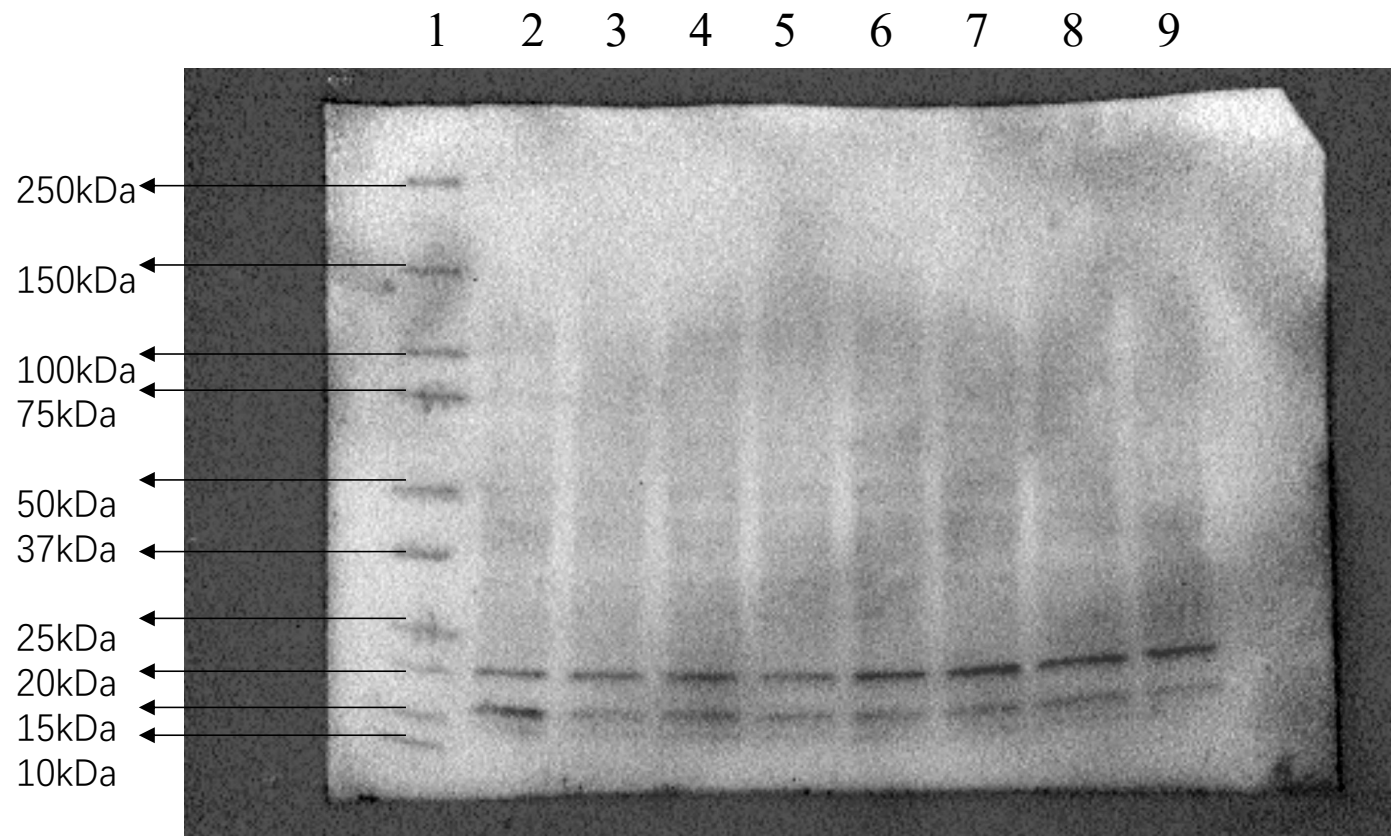

50 S

**Bax 20 kDa**

- 1.Marker
- 2.Cont 1
- 3.Cont 2
- 4.BB 25  $\mu$ M-1
- 5.BB 25  $\mu$ M-2
- 6.BB 50  $\mu$ M-1
- 7.BB 50  $\mu$ M-2
- 8.BB 100  $\mu$ M-1
- 9.BB 100  $\mu$ M-2

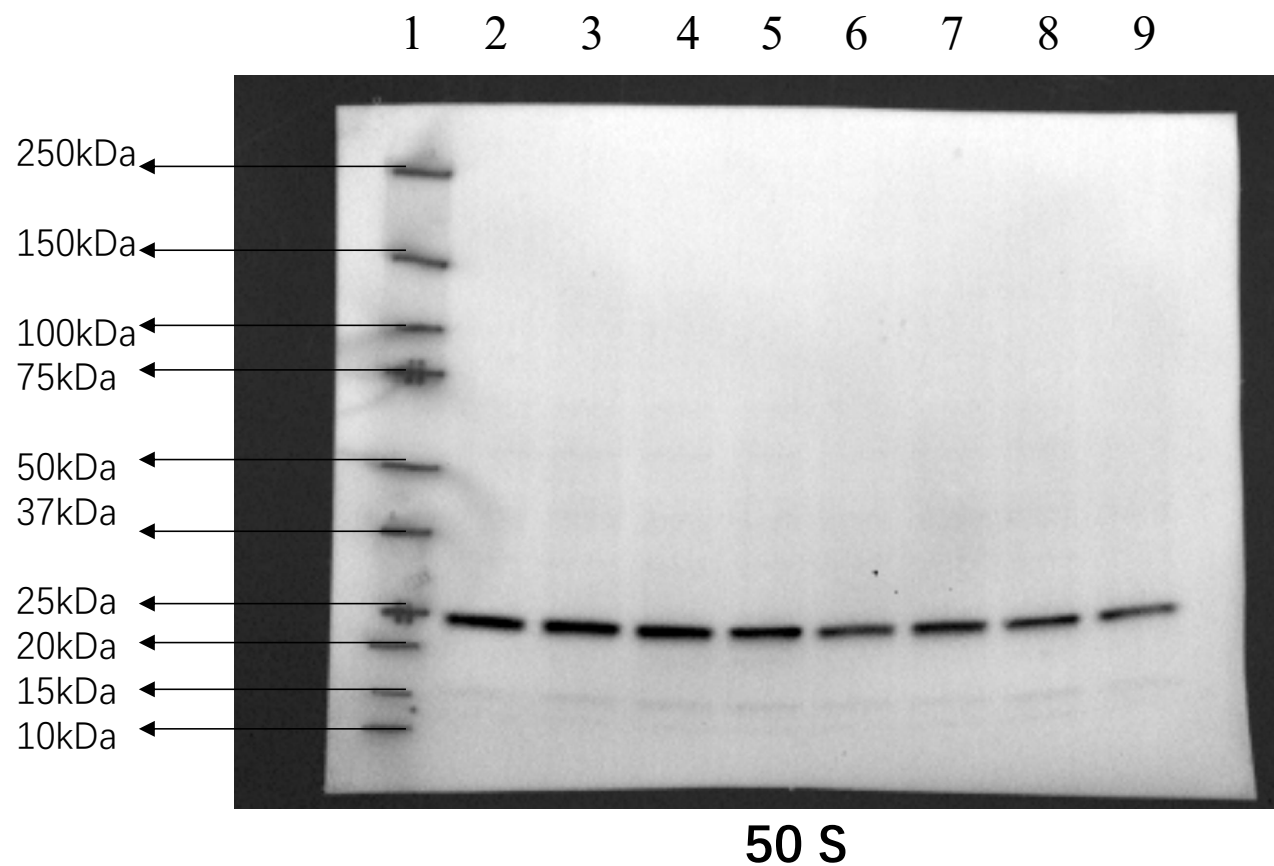

**Bcl-2 26 kDa**

- 1.Marker
- 2.Cont 1
- 3.Cont 2
- 4.BB 25  $\mu$ M-1
- 5.BB 25  $\mu$ M-2
- 6.BB 50  $\mu$ M-1
- 7.BB 50  $\mu$ M-2
- 8.BB 100  $\mu$ M-1
- 9.BB 100  $\mu$ M-2

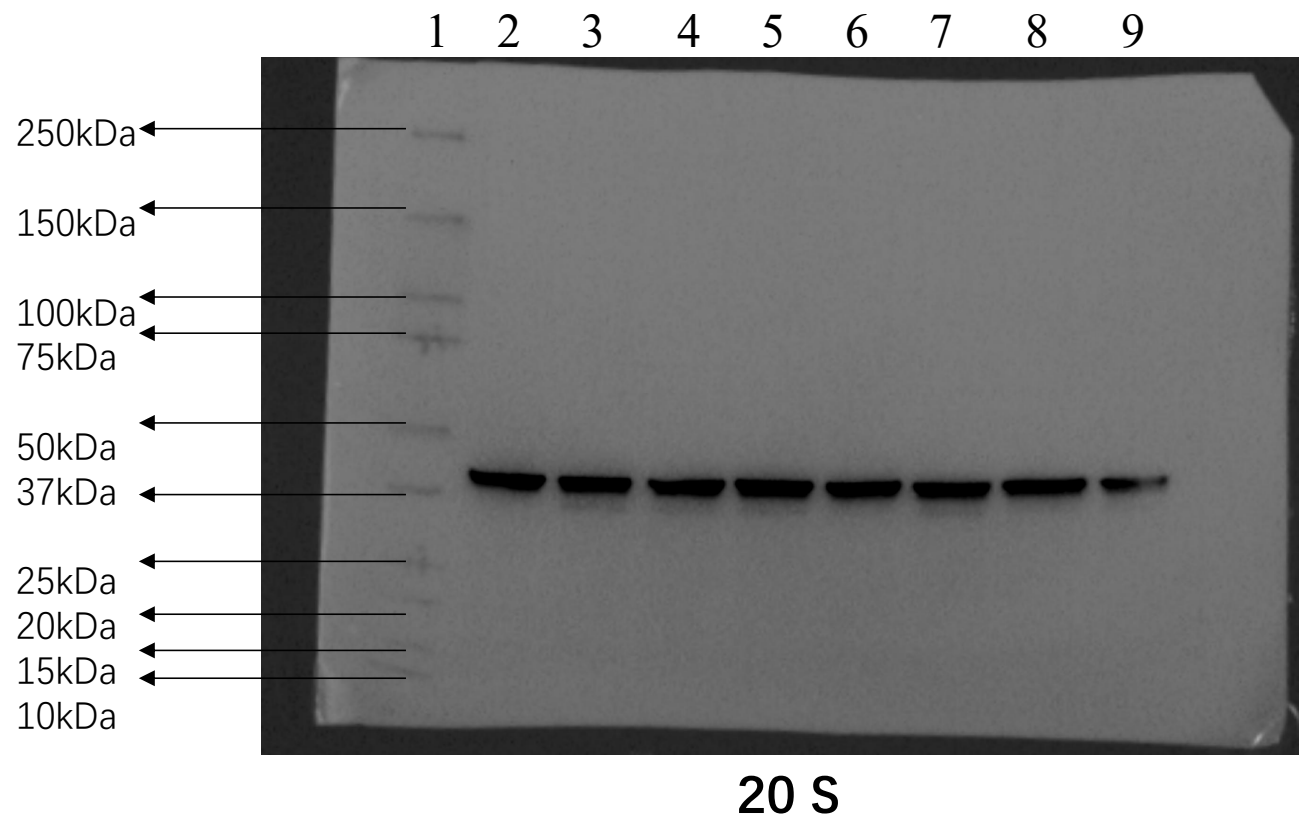

**$\beta$ -Actin 43 kDa**

- 1.Marker
- 2.Cont 1
- 3.Cont 2
- 4.BB 25  $\mu$ M-1
- 5.BB 25  $\mu$ M-2
- 6.BB 50  $\mu$ M-1
- 7.BB 50  $\mu$ M-2
- 8.BB 100  $\mu$ M-1
- 9.BB 100  $\mu$ M-2

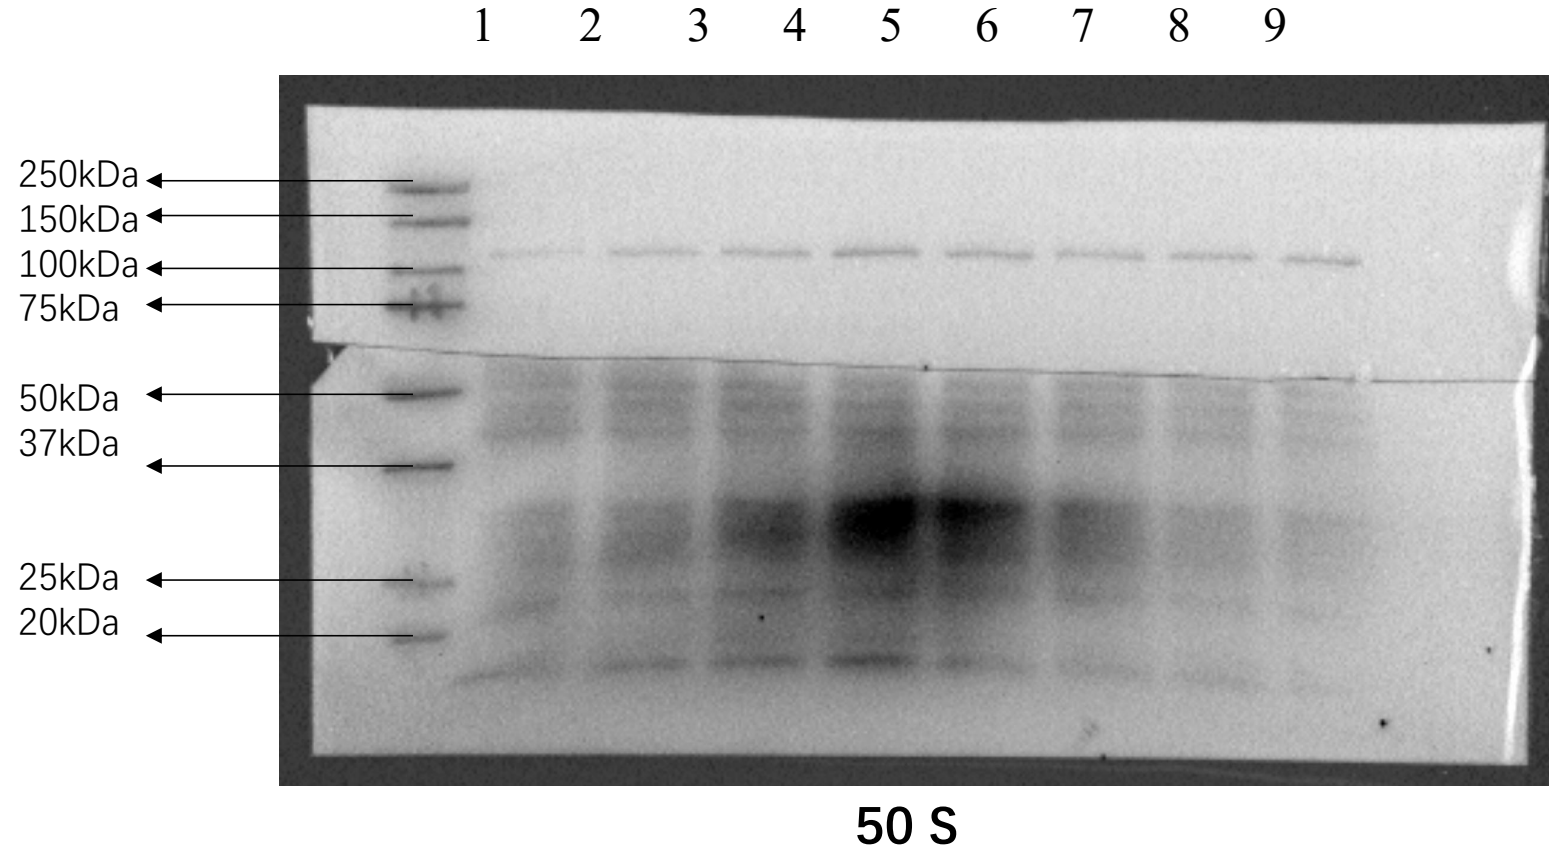

**PARP 116 kDa**  
**cleaved PARP 23 kDa**

- 1.Marker
- 2.Cont 1
- 3.Cont 2
- 4.BB 25  $\mu$ M-1
- 5.BB 25  $\mu$ M-2
- 6.BB 50  $\mu$ M-1
- 7.BB 50  $\mu$ M-2
- 8.BB 100  $\mu$ M-1
- 9.BB 100  $\mu$ M-2

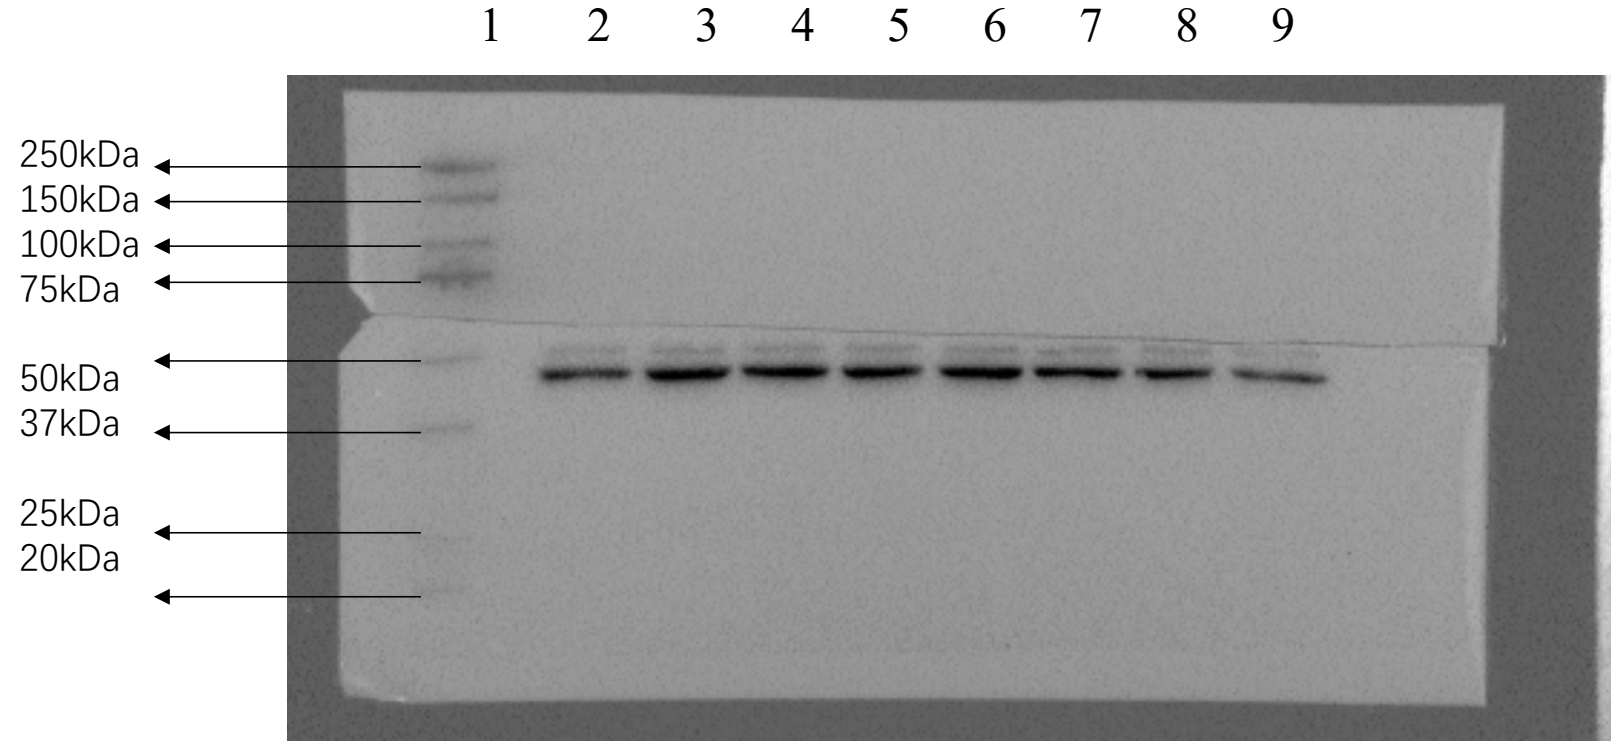

30 S

**$\beta$ -Actin 43 kDa**

- 1.Marker
- 2.Cont 1
- 3.Cont 2
- 4.BB 25  $\mu$ M-1
- 5.BB 25  $\mu$ M-2
- 6.BB 50  $\mu$ M-1
- 7.BB 50  $\mu$ M-2
- 8.BB 100  $\mu$ M-1
- 9.BB 100  $\mu$ M-2

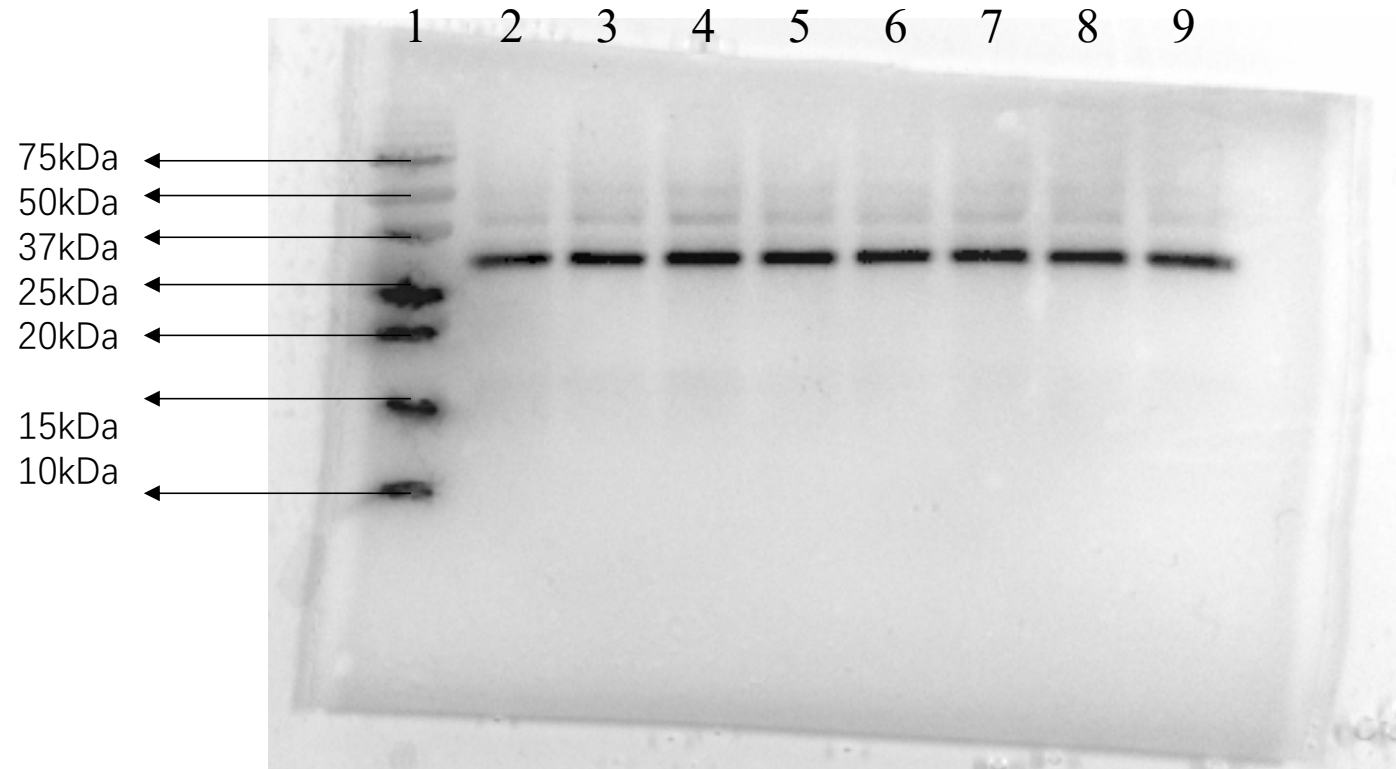

4.3 S

**Caspase 3 35 kDa**

- 1.Marker
- 2.Cont 1
- 3.Cont 2
- 4.BB 25  $\mu\text{M}$ -1
- 5.BB 25  $\mu\text{M}$ -2
- 6.BB 50  $\mu\text{M}$ -1
- 7.BB 50  $\mu\text{M}$ -2
- 8.BB 100  $\mu\text{M}$ -1
- 9.BB 100  $\mu\text{M}$ -2

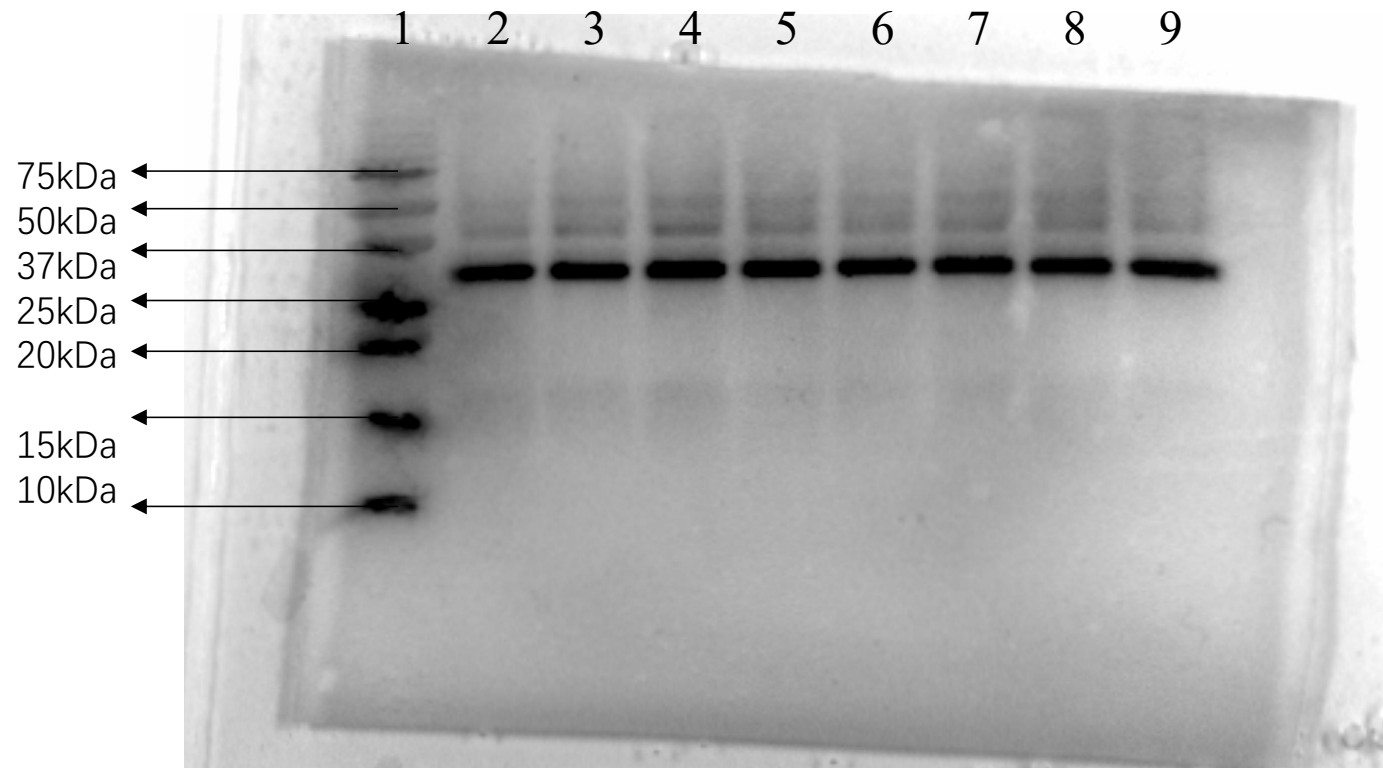

6 S

**cleaved Caspase 3 19 kDa**

- 1.Marker
- 2.Cont 1
- 3.Cont 2
- 4.BB 25  $\mu\text{M}$ -1
- 5.BB 25  $\mu\text{M}$ -2
- 6.BB 50  $\mu\text{M}$ -1
- 7.BB 50  $\mu\text{M}$ -2
- 8.BB 100  $\mu\text{M}$ -1
- 9.BB 100  $\mu\text{M}$ -2

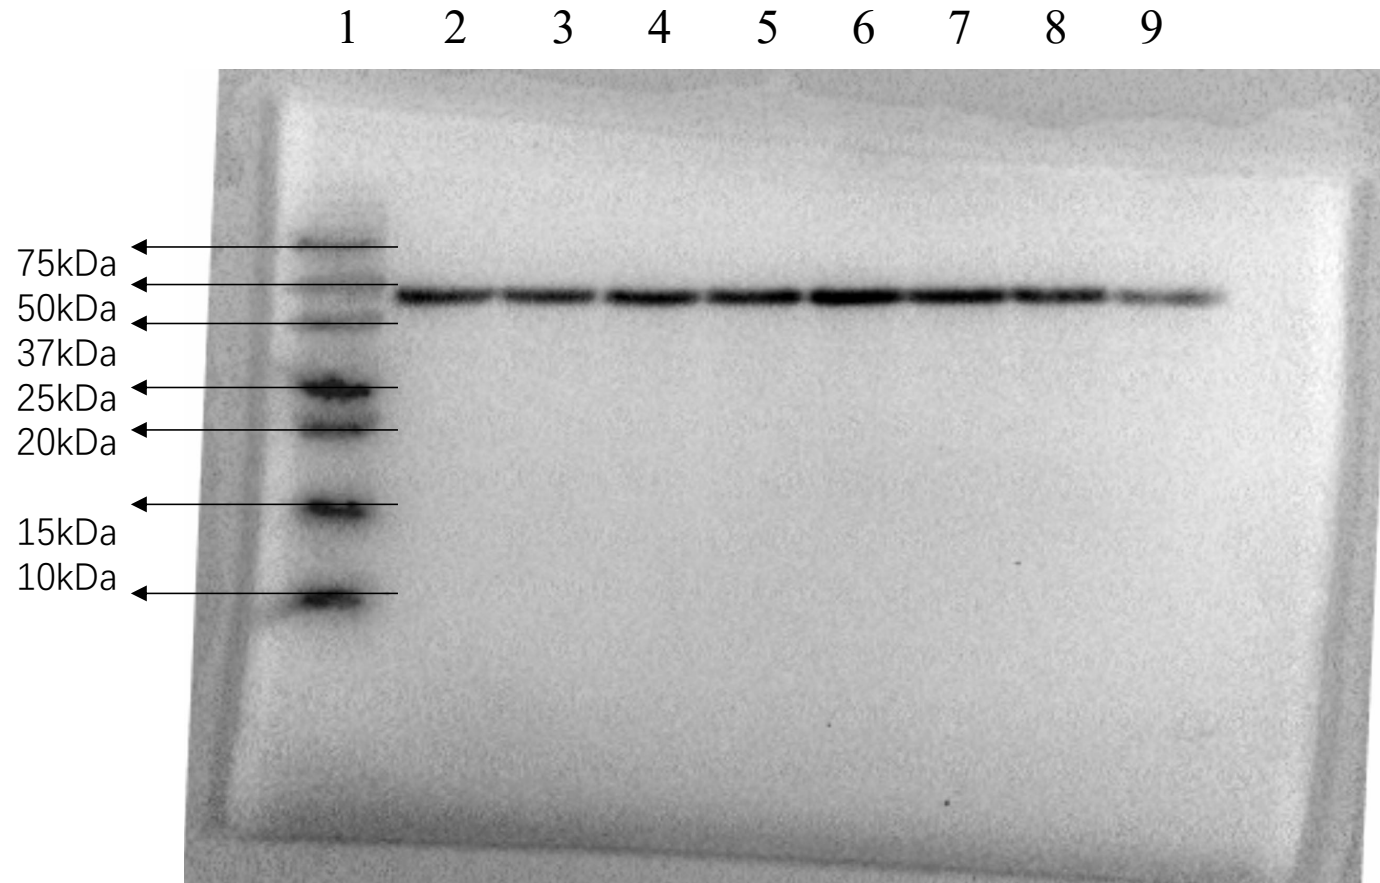

60 S

**$\beta$ -Actin 43 kDa**



- 1.Marker
- 2.Cont 1
- 3.Cont 2
- 4.BB 25  $\mu$ M-1
- 5.BB 25  $\mu$ M-2
- 6.BB 50  $\mu$ M-1
- 7.BB 50  $\mu$ M-2
- 8.BB 100  $\mu$ M-1
- 9.BB 100  $\mu$ M-2

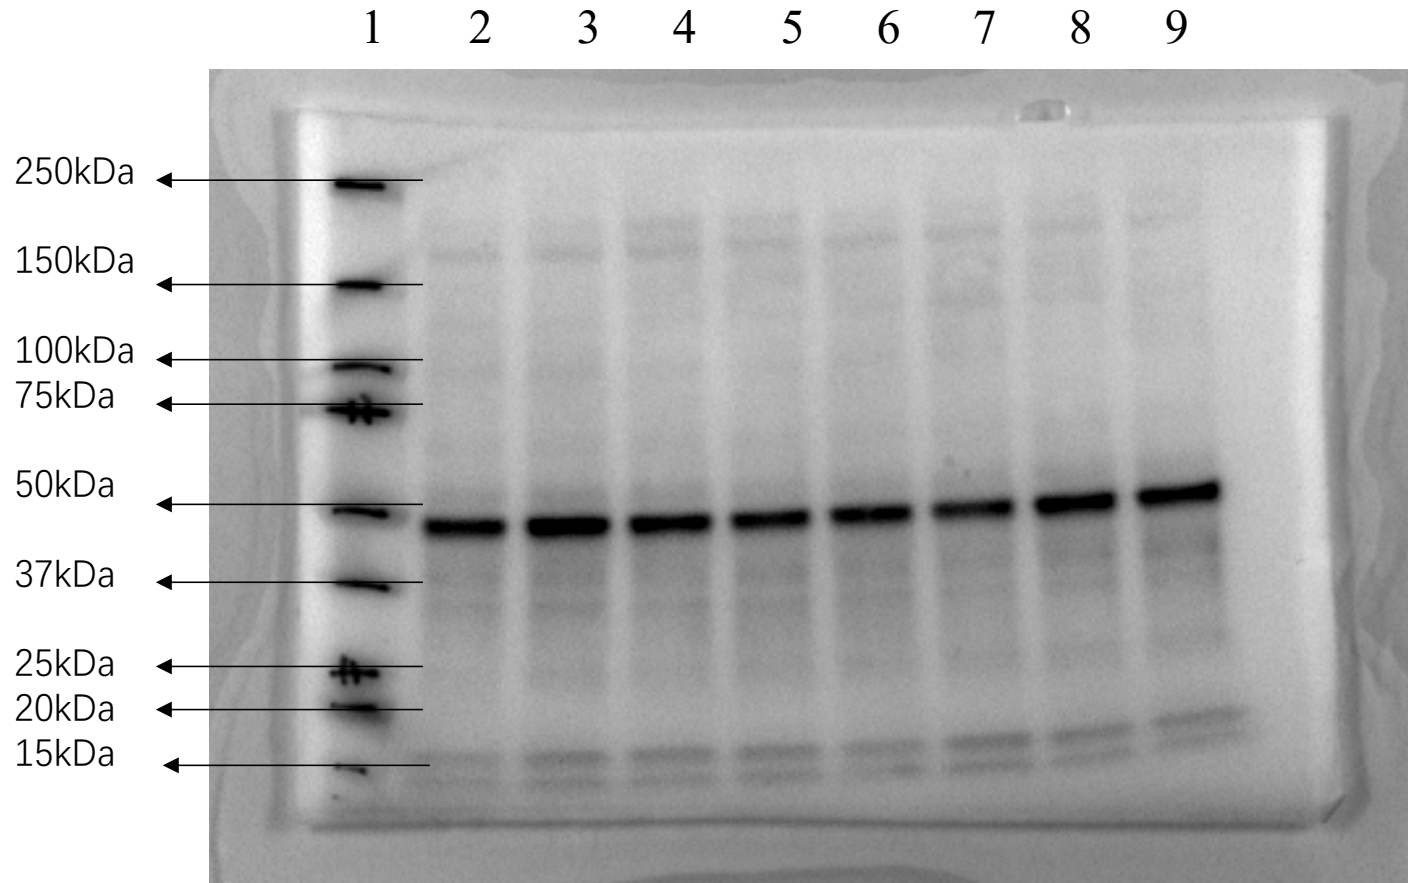

4 S

**Caspase 9 46 kDa**

- 1.Marker
- 2.Cont 1
- 3.Cont 2
- 4.BB 25  $\mu\text{M}$ -1
- 5.BB 25  $\mu\text{M}$ -2
- 6.BB 50  $\mu\text{M}$ -1
- 7.BB 50  $\mu\text{M}$ -2
- 8.BB 100  $\mu\text{M}$ -1
- 9.BB 100  $\mu\text{M}$ -2

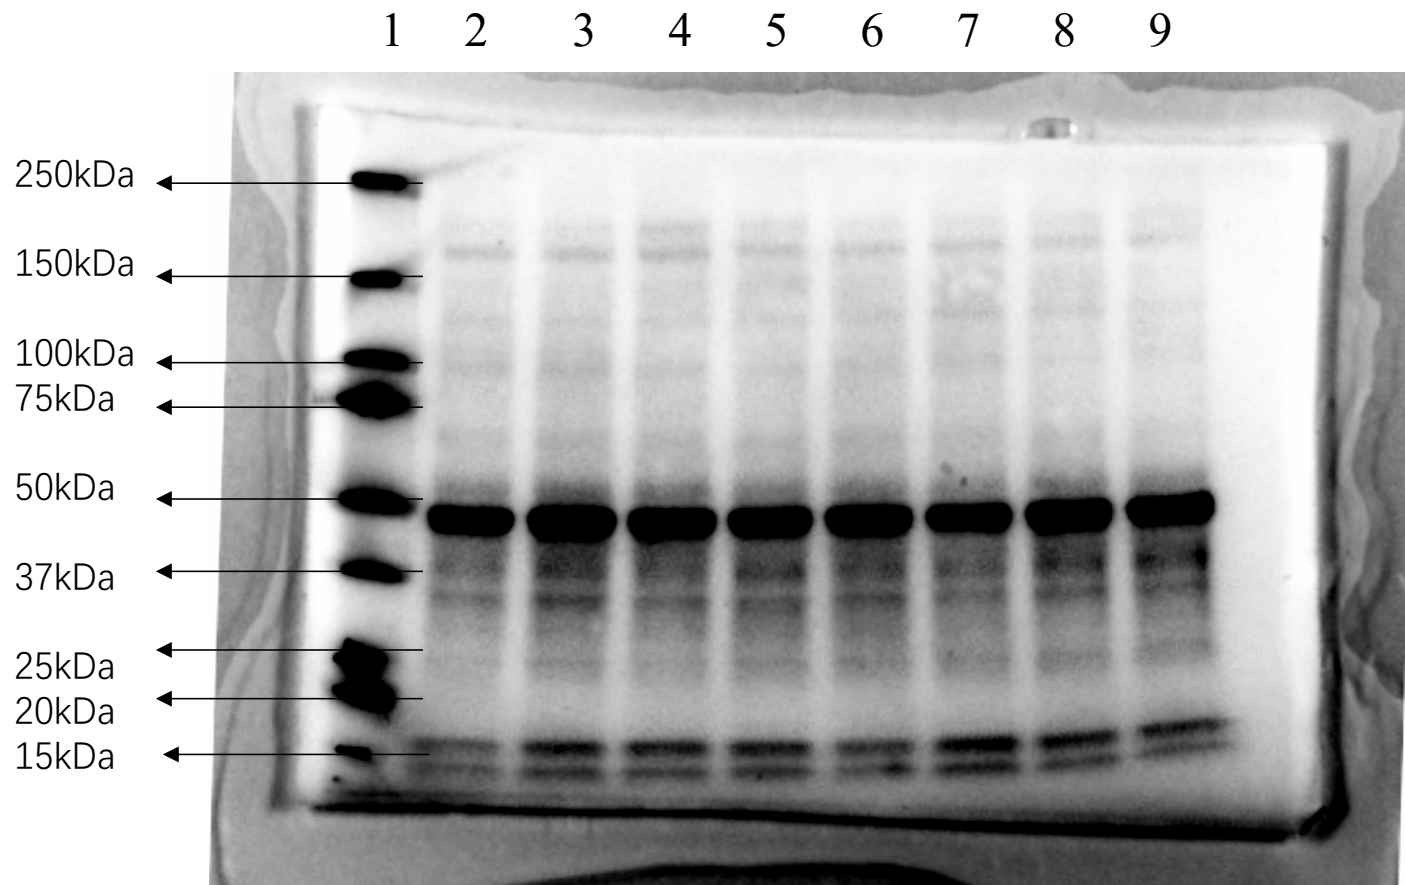

5 S

**cleaved Caspase 9 39、37 kDa**

- 1.Marker
- 2.Cont 1
- 3.Cont 2
- 4.BB 25  $\mu$ M-1
- 5.BB 25  $\mu$ M-2
- 6.BB 50  $\mu$ M-1
- 7.BB 50  $\mu$ M-2
- 8.BB 100  $\mu$ M-1
- 9.BB 100  $\mu$ M-2

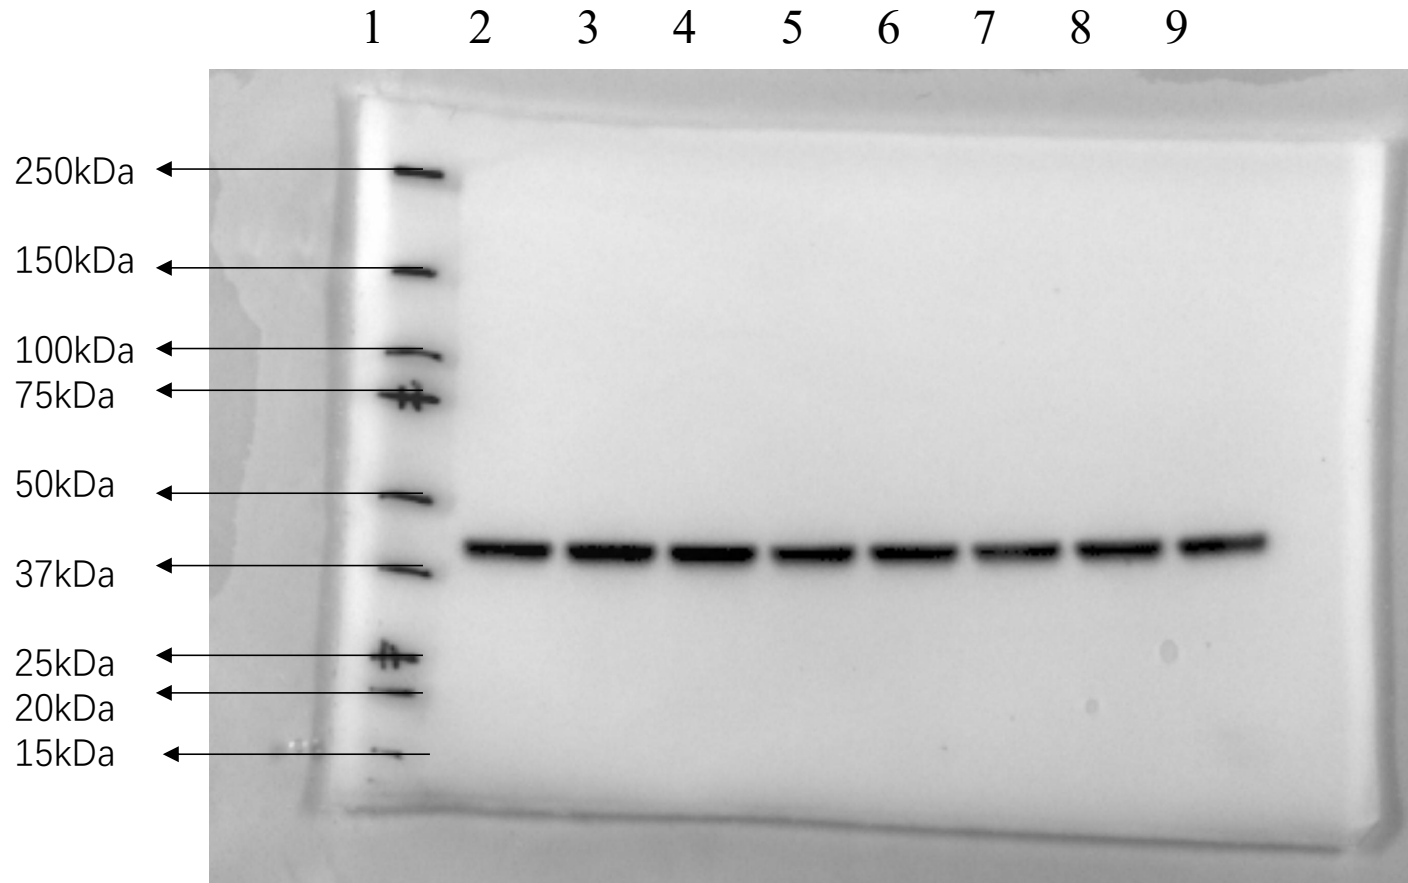

2 S

$\beta$ -Actin 43 kDa

- 1.Marker
- 2.Cont 1
- 3.Cont 2
- 4.BB 25  $\mu$ M-1
- 5.BB 25  $\mu$ M-2
- 6.BB 50  $\mu$ M-1
- 7.BB 50  $\mu$ M-2
- 8.BB 100  $\mu$ M-1
- 9.BB 100  $\mu$ M-2

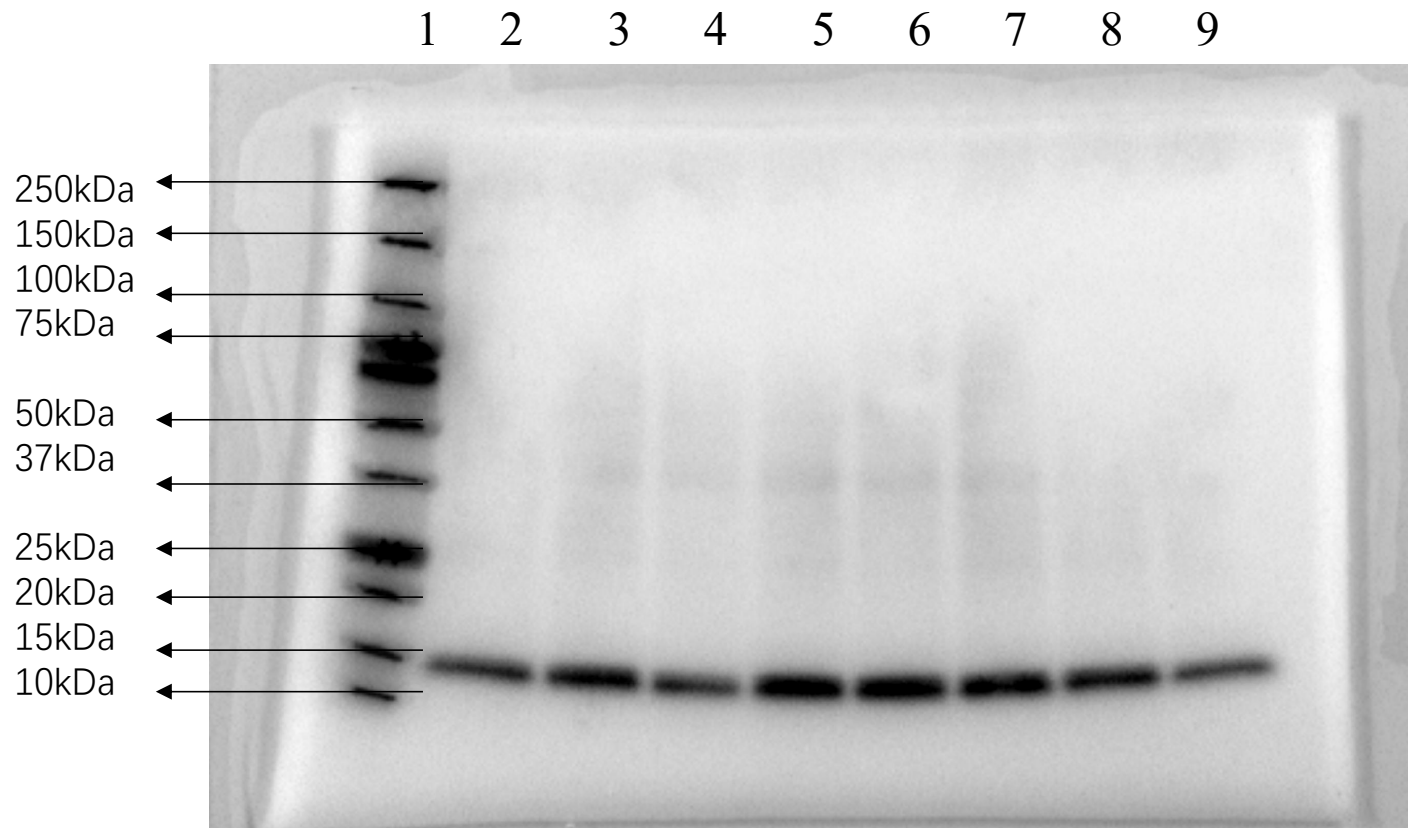

5 S

**Cytochrome C 12 kDa**

- 1.Marker
- 2.Cont 1
- 3.Cont 2
- 4.BB 25  $\mu$ M-1
- 5.BB 25  $\mu$ M-2
- 6.BB 50  $\mu$ M-1
- 7.BB 50  $\mu$ M-2
- 8.BB 100  $\mu$ M-1
- 9.BB 100  $\mu$ M-2

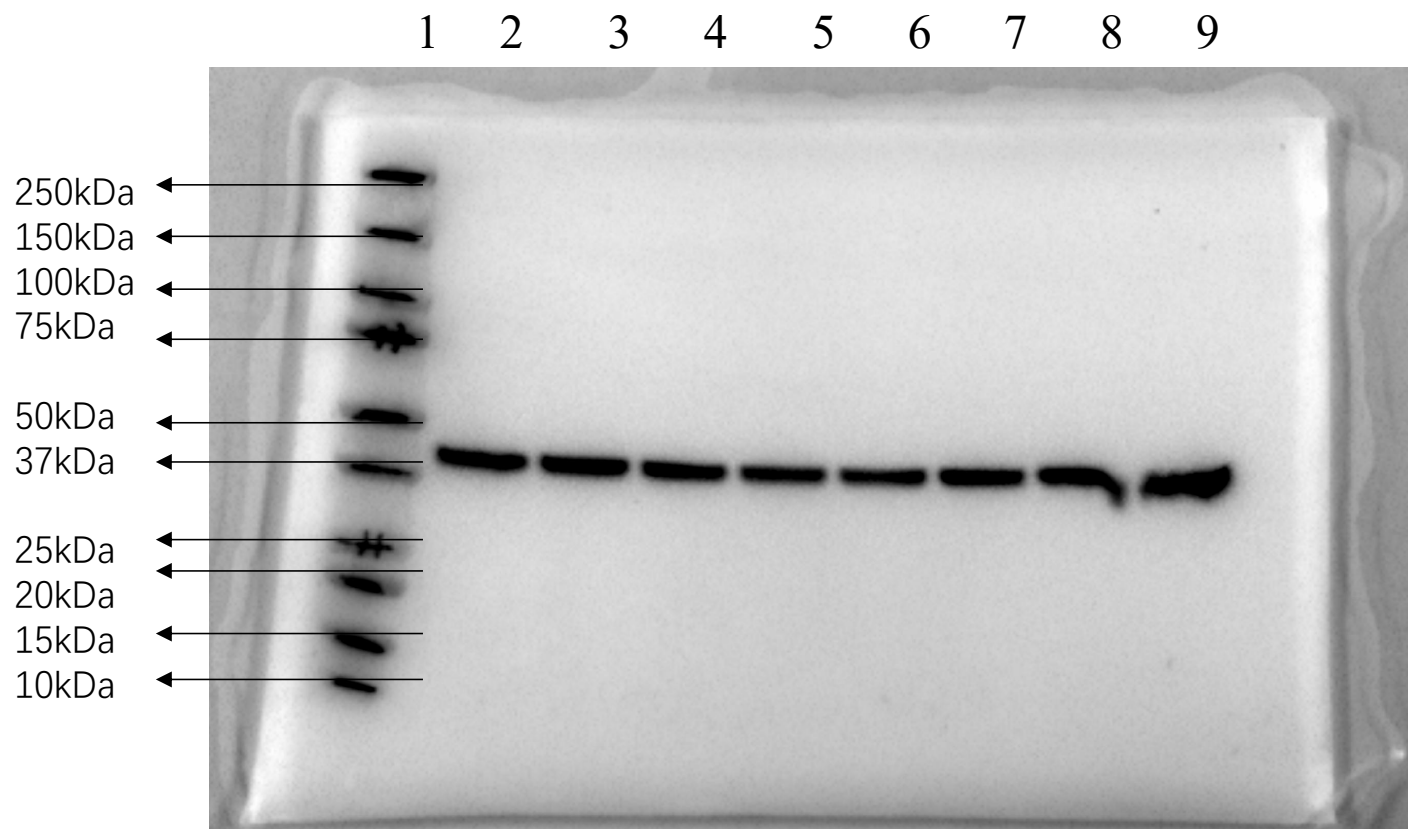

5 S

**$\beta$ -Actin 43 kDa**
